# Supplementary material
Source: PubMed Central journal article supplement (PMC3868629)
Supplement: NIHMS534563-supplement-1_si_001.pdf [file NIHMS534563-supplement-1_si_001.pdf]

## Supporting Information:

# Chemiluminescent Detection of Enzymatically-Produced Hydrogen Sulfide: Substrate Hydrogen Bonding Influences Selectivity for H<sub>2</sub>S over Biological Thiols

T. Spencer Bailey, Michael D. Pluth\*

Department of Chemistry and Biochemistry  
Institute of Molecular Biology  
University of Oregon  
Eugene, OR 97403-1253.

### Contact Information:

Michael D. Pluth  
pluth@uoregon.edu

| Table of Contents |                                                                 | Page |
|-------------------|-----------------------------------------------------------------|------|
| 1.                | Selectivity data                                                | S2   |
| 2.                | Photosensitivity data                                           | S2   |
| 3.                | <sup>1</sup> H and <sup>13</sup> C{ <sup>1</sup> H} NMR spectra | S3   |
| 4.                | Representative NMR titrations                                   | S6   |
| 5.                | Tabulated chemical shifts for titration data                    | S8   |
| 6.                | Mass spectra                                                    | S12  |
| 7.                | UV-Data                                                         | S13  |
| 8.                | DFT calculations                                                | S14  |

## Selectivity Data

**Table S1.** Selectivity of CLSS-1 and CLSS-2 with 33 equiv. of selected biologically-relevant reactive sulfur, oxygen, and nitrogen species.

| Reactant                                    | Normalized Luminescence ( $CL/CL_0$ ) |                |
|---------------------------------------------|---------------------------------------|----------------|
|                                             | CLSS-1                                | CLSS-2         |
| Blank                                       | $1.0 \pm 0.1$                         | $1.0 \pm 0.3$  |
| H <sub>2</sub> S                            | $128 \pm 16$                          | $45 \pm 3$     |
| Cys                                         | $81 \pm 5$                            | $1.5 \pm 0.03$ |
| GSH                                         | $94 \pm 12$                           | $3.7 \pm 0.9$  |
| Hcy                                         | $57 \pm 3$                            | $3.3 \pm 0.5$  |
| NAC                                         | $37 \pm 19$                           | $3.3 \pm 0.4$  |
| Toluenethiol (TolSH)                        | $0.8 \pm 0.1$                         | $1.9 \pm 0.4$  |
| 2-mercaptoethanol (2-ME)                    | $6.6 \pm 3.2$                         | $1.7 \pm 0.08$ |
| S <sub>2</sub> O <sub>3</sub> <sup>2-</sup> | $5.9 \pm 1.1$                         | $2.2 \pm 0.6$  |
| SO <sub>4</sub> <sup>2-</sup>               | $0.8 \pm 0.3$                         | $1.5 \pm 0.3$  |
| NO <sub>2</sub> <sup>-</sup>                | $0.9 \pm 0.2$                         | $3.2 \pm 0.6$  |
| SNAP (NO)                                   | $0.05 \pm 0.01$                       | $1.5 \pm 0.5$  |
| ONOO <sup>-</sup>                           | $0.6 \pm 0.2$                         | $4.0 \pm 0.2$  |
| HNO                                         | $9.1 \pm 0.2$                         | $3.3 \pm 0.2$  |

## Photoactivation of Azides

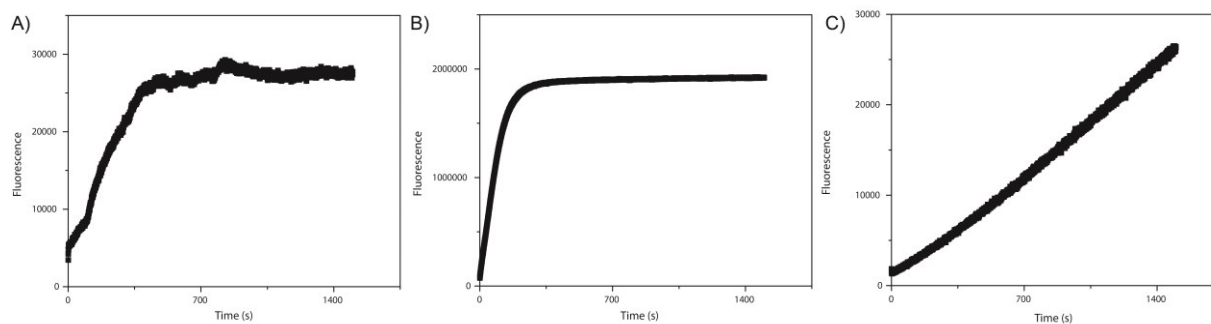

**Figure S1.** Photoactivation of (a) HSN2 ( $\lambda_{ex}$  = 435 nm,  $\lambda_{em}$  = 550 nm), (b) C-7Az ( $\lambda_{ex}$  = 340 nm,  $\lambda_{em}$  = 445 nm), and (c) DNS-Az ( $\lambda_{ex}$  = 340 nm,  $\lambda_{em}$  = 510 nm). Measurements performed on 5  $\mu$ M probe in pH 7.4 PIPES buffer (50 mM PIPES, 100 mM KCl, pH 7.4). Slits: excitation = 5 nm, emission = 1.4 nm.

## NMR Spectra

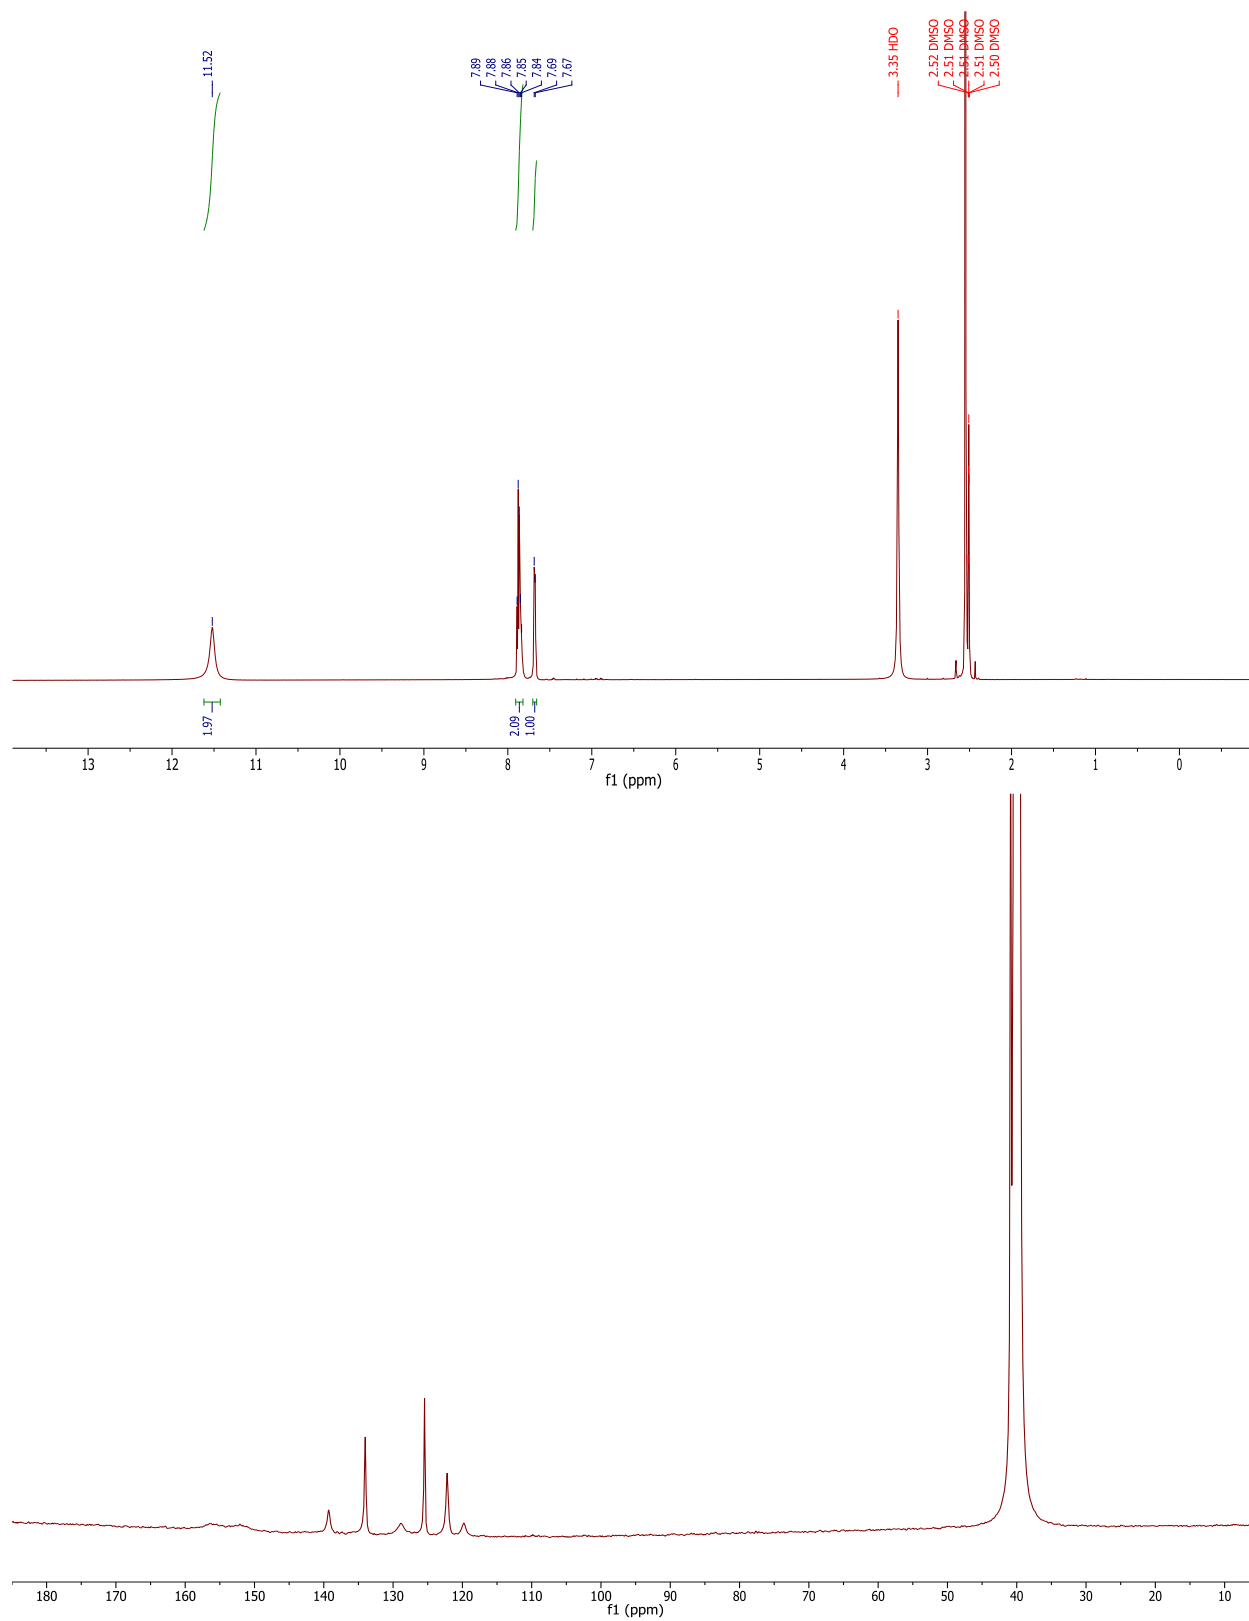

Figure S2.  $^1\text{H}$  (600 MHz, DMSO) and  $^{13}\text{C}\{^1\text{H}\}$  (150 MHz, DMSO) NMR spectra of CLSS-1.

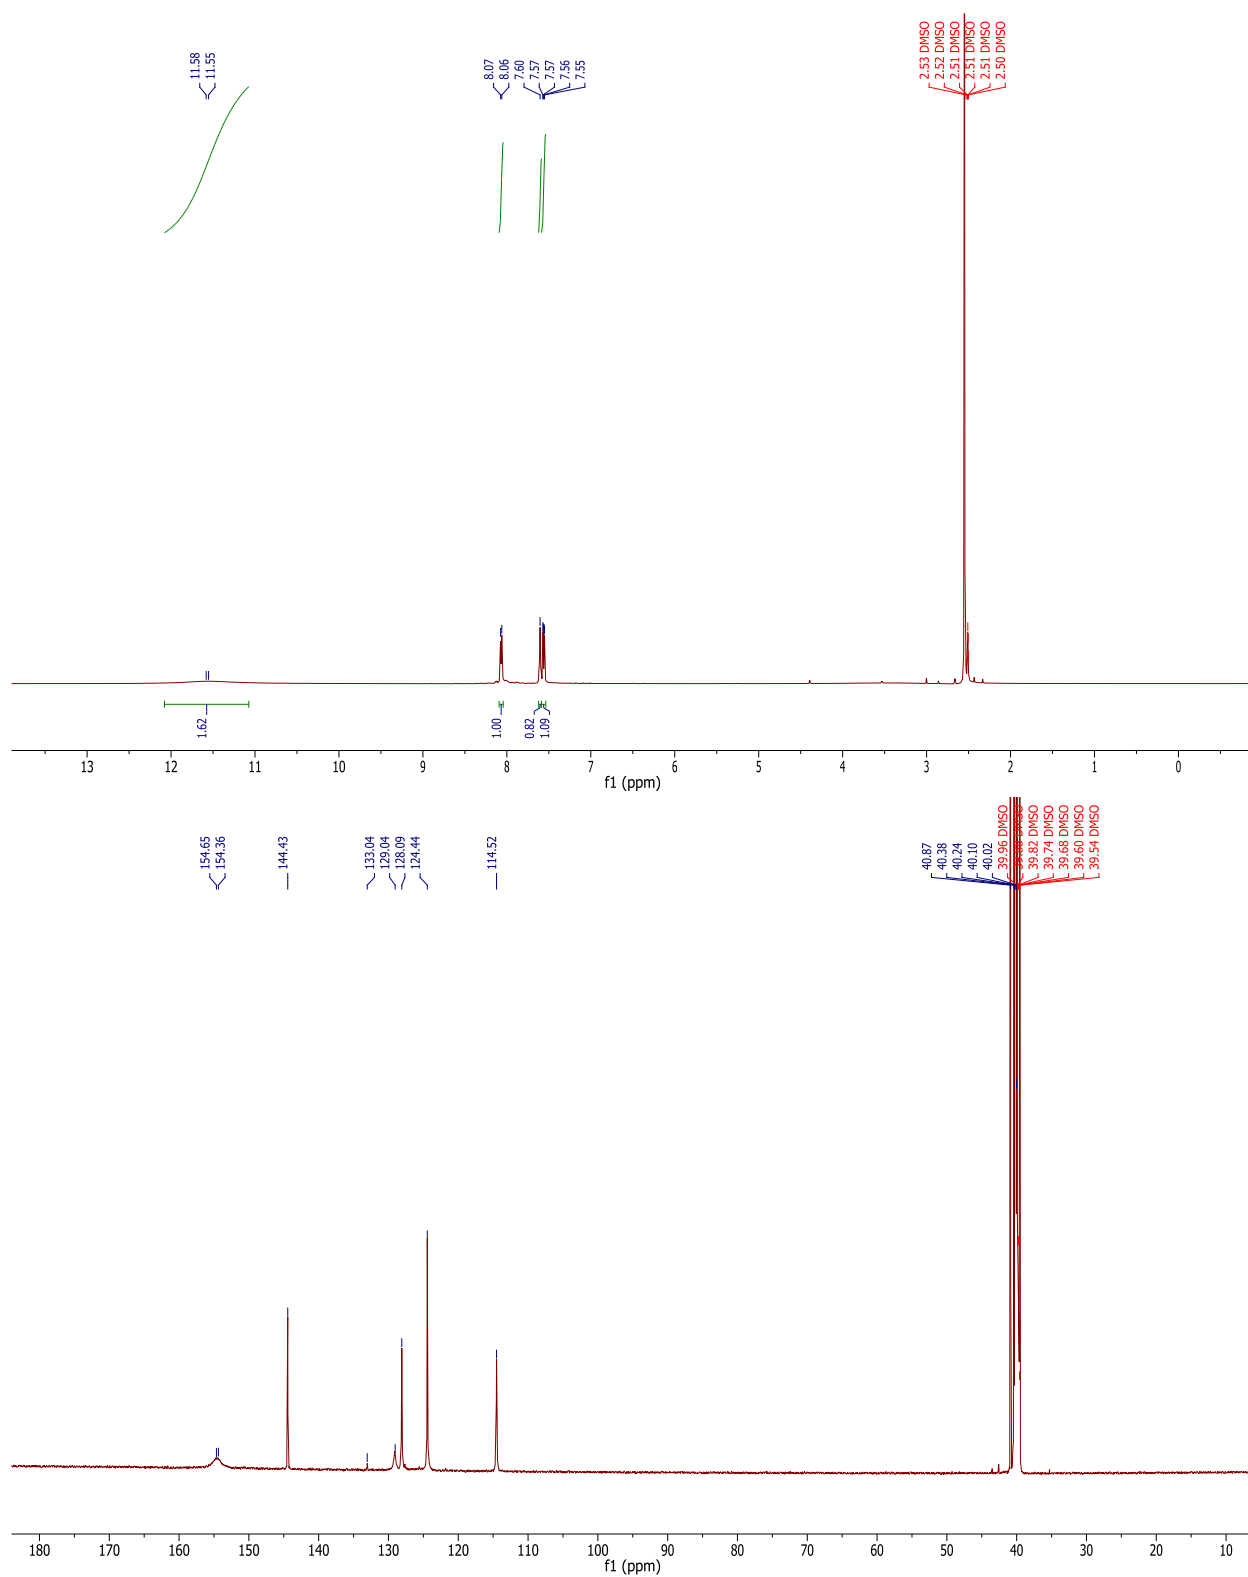

**Figure S3.**  $^1\text{H}$  (600 MHz, DMSO) and  $^{13}\text{C}\{^1\text{H}\}$  (150 MHz, DMSO) NMR spectra of CLSS-2.

t = 90 min

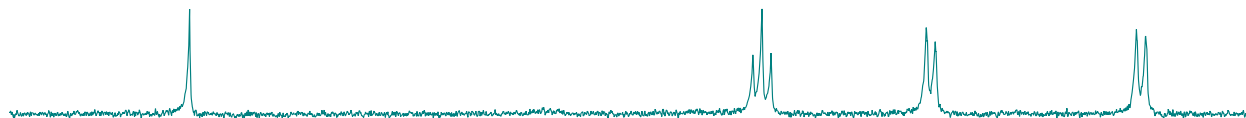

t = 0 min

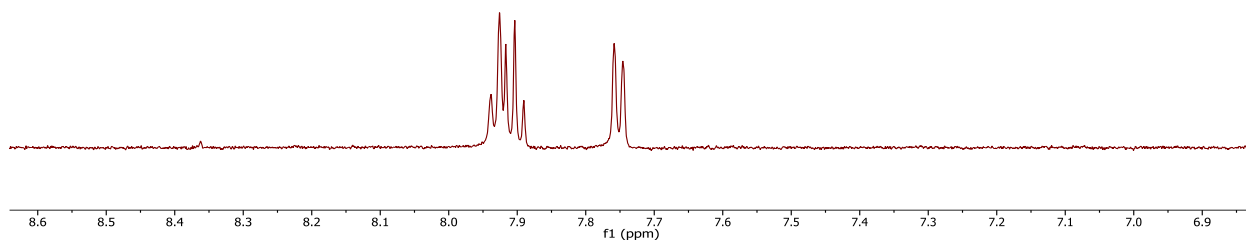

**Figure S4.**  $^1\text{H}$  NMR spectra (600 MHz, 1% DMSO in  $\text{D}_2\text{O}$ ) of CLSS-1 before (bottom) and 90 min after (top) reaction with  $\text{H}_2\text{S}$  showing clean conversion to the parent amine.

t = 10 min

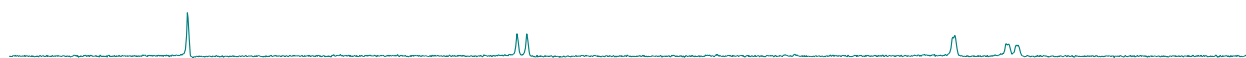

t = 0 min

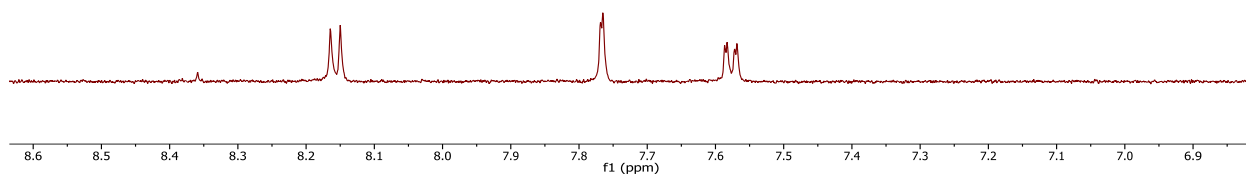

**Figure S5.**  $^1\text{H}$  NMR spectra (600 MHz, 1% DMSO in  $\text{D}_2\text{O}$ ) of CLSS-2 before (bottom) and 10 min after (top) reaction with  $\text{H}_2\text{S}$  showing clean conversion to the parent amine.

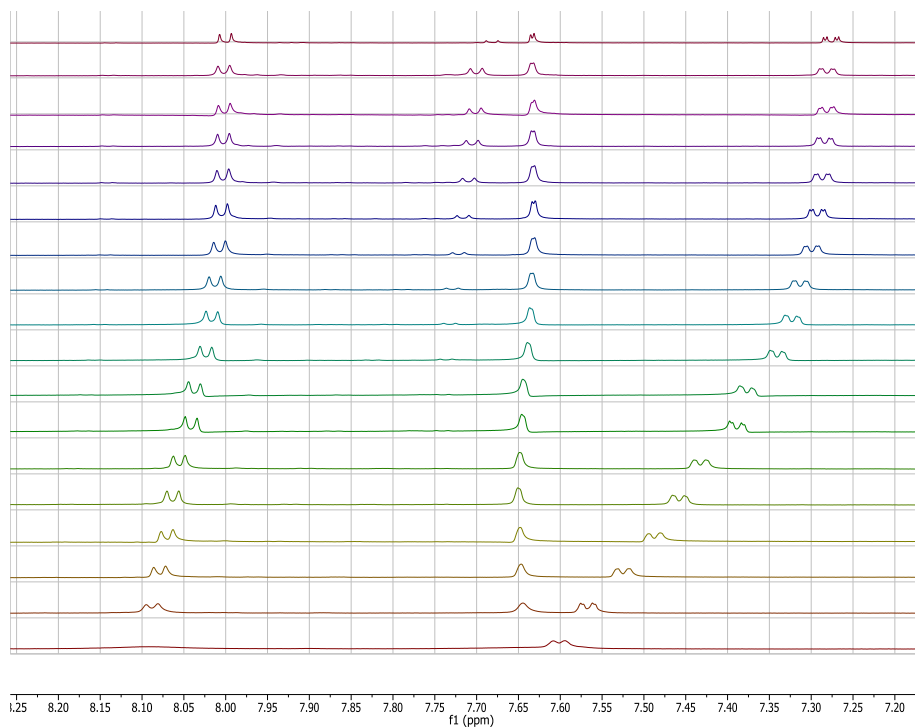

**Figure S6.** Representative titration of 10 mM CLSS-2 with 0-200 mM TBA-Ser.

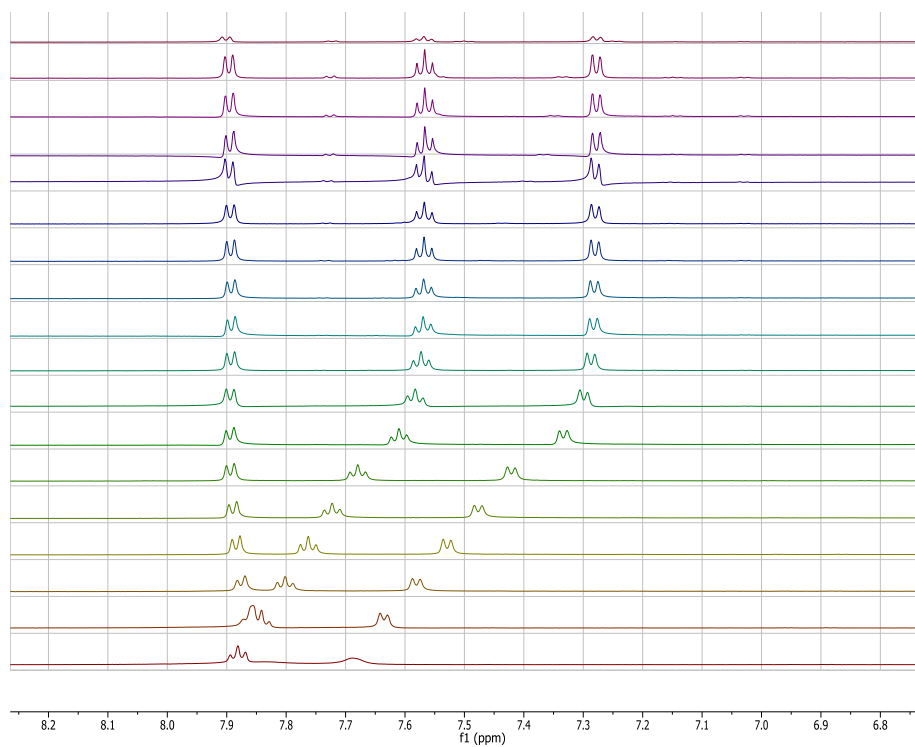

**Figure S7.** Representative titration of 10 mM CLSS-1 with 0-200 mM TBA-Val

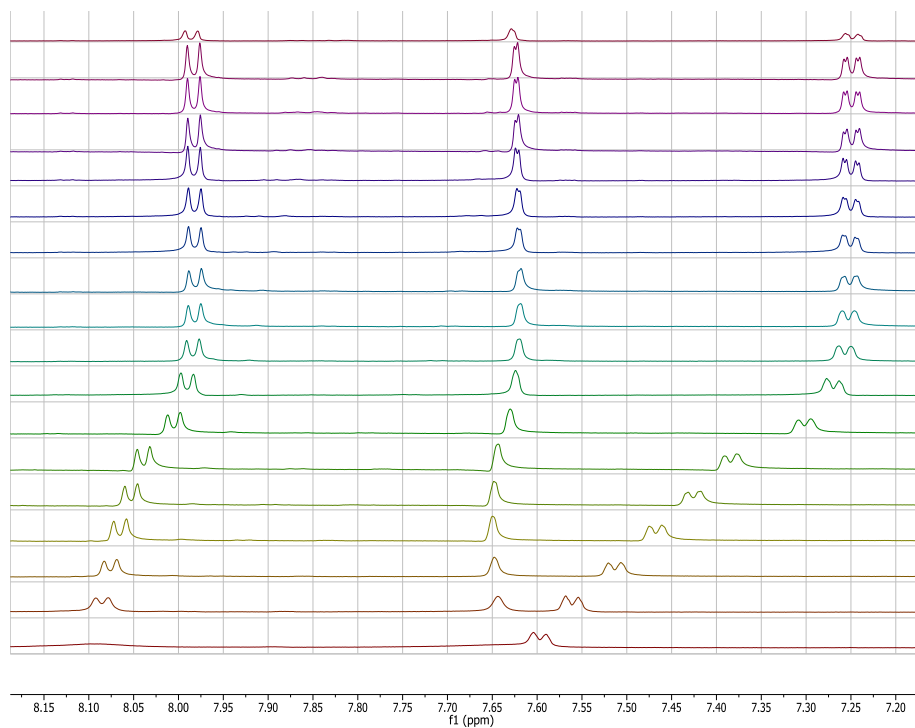

**Figure S8.** Representative titration of 10 mM CLSS-2 with 0-200 mM TBA-Val

## Tabulated NMR Titration Data

**Table S2. Tabulated titration data for CLSS-1 with TBA-Ser.**

| [CLSS-1]<br>(M) | [TBA-Ser]<br>(M) | Run 1             |                   | Run 2             |                   | Run 3             |                   |
|-----------------|------------------|-------------------|-------------------|-------------------|-------------------|-------------------|-------------------|
|                 |                  | Proton 1<br>(ppm) | Proton 2<br>(ppm) | Proton 1<br>(ppm) | Proton 2<br>(ppm) | Proton 1<br>(ppm) | Proton 2<br>(ppm) |
| 0.010091        | 0                | 7.883             | 7.687             | 7.881             | 7.685             | 7.898             | 7.694             |
| 0.010091        | 0.001353         | 7.847             | 7.643             | 7.841             | 7.636             | 7.84              | 7.634             |
| 0.010091        | 0.002688         | 7.818             | 7.602             | 7.805             | 7.587             | 7.803             | 7.583             |
| 0.010091        | 0.004006         | 7.789             | 7.563             | 7.775             | 7.548             | 7.772             | 7.542             |
| 0.010091        | 0.005307         | 7.766             | 7.533             | 7.751             | 7.514             | 7.748             | 7.51              |
| 0.010091        | 0.006591         | 7.746             | 7.507             | 7.731             | 7.485             | 7.727             | 7.482             |
| 0.010091        | 0.00973          | 7.707             | 7.457             | 7.691             | 7.437             | 7.69              | 7.434             |
| 0.010091        | 0.01277          | 7.681             | 7.423             | 7.667             | 7.405             | 7.665             | 7.403             |
| 0.010091        | 0.018575         | 7.649             | 7.383             | 7.636             | 7.367             | 7.636             | 7.366             |
| 0.010091        | 0.024038         | 7.633             | 7.361             | 7.621             | 7.348             | 7.62              | 7.346             |
| 0.010091        | 0.029189         | 7.622             | 7.348             | 7.612             | 7.335             | 7.611             | 7.335             |
| 0.010091        | 0.040865         | 7.607             | 7.329             | 7.602             | 7.318             | 7.598             | 7.319             |
| 0.010091        | 0.051081         | 7.6               | 7.32              | 7.591             | 7.31              | 7.591             | 7.31              |
| 0.010091        | 0.068108         | 7.593             | 7.311             | 7.586             | 7.303             | 7.585             | 7.302             |
| 0.010091        | 0.08173          | 7.589             | 7.307             | 7.584             | 7.299             | 7.583             | 7.298             |
| 0.010091        | 0.092874         | 7.587             | 7.303             | 7.582             | 7.297             | 7.581             | 7.296             |
| 0.010091        | 0.102162         | 7.587             | 7.302             | 7.58              | 7.296             | 7.579             | 7.294             |
| 0.010091        | 0.204324         | 7.579             | 7.287             | 7.576             | 7.288             | 7.577             | 7.287             |



**Table S3. Tabulated titration data for CLSS-2 with TBA-Ser.**

| [CLSS-2]<br>(M) | [TBA-Ser]<br>(M) | Run 1             |                   | Run 2             |                   | Run 3             |                   |
|-----------------|------------------|-------------------|-------------------|-------------------|-------------------|-------------------|-------------------|
|                 |                  | Proton 1<br>(ppm) | Proton 2<br>(ppm) | Proton 1<br>(ppm) | Proton 2<br>(ppm) | Proton 1<br>(ppm) | Proton 2<br>(ppm) |
| 0.010091        | 0                | 7.598             | 8.094             | 7.599             | 8.109             | 7.601             | 8.093             |
| 0.010091        | 0.001339         | 7.577             | 8.088             | 7.568             | 8.087             | 7.567             | 8.088             |
| 0.010091        | 0.00266          | 7.542             | 8.082             | 7.515             | 8.074             | 7.525             | 8.077             |
| 0.010091        | 0.003964         | 7.509             | 8.075             | 7.47              | 8.063             | 7.487             | 8.07              |
| 0.010091        | 0.005252         | 7.482             | 8.069             | 7.438             | 8.054             | 7.458             | 8.063             |
| 0.010091        | 0.006522         | 7.455             | 8.061             | 7.416             | 8.048             | 7.432             | 8.056             |
| 0.010091        | 0.009628         |                   |                   |                   |                   | 7.389             | 8.042             |
| 0.010091        | 0.012636         | 7.383             | 8.039             | 7.354             | 8.026             | 7.377             | 8.036             |
| 0.010091        | 0.01838          | 7.35              | 8.027             | 7.326             | 8.016             | 7.341             | 8.024             |
| 0.010091        | 0.023786         | 7.33              | 8.021             | 7.313             | 8.011             | 7.323             | 8.018             |
| 0.010091        | 0.028883         | 7.321             | 8.016             | 7.304             | 8.006             | 7.313             | 8.014             |
| 0.010091        | 0.040437         | 7.304             | 8.009             | 7.294             | 8.004             | 7.299             | 8.007             |
| 0.010091        | 0.050546         | 7.297             | 8.008             | 7.288             | 8.003             | 7.292             | 8.005             |
| 0.010091        | 0.067395         | 7.291             | 8.004             | 7.283             | 7.999             | 7.286             | 8.004             |
| 0.010091        | 0.080874         | 7.287             | 8.003             | 7.28              | 7.999             | 7.2835            | 8.003             |
| 0.010091        | 0.091902         |                   |                   | 7.278             | 7.999             | 7.2815            | 8.002             |
| 0.010091        | 0.101092         |                   |                   | 7.277             | 7.998             | 7.28              | 8.002             |
| 0.010091        | 0.202184         | 7.275             | 7.999             | 7.276             | 7.998             | 7.275             | 8.001             |

**Table S4. Tabulated titration data for CLSS-1 with TBA-Val**

| [CLSS-1]<br>(M) | [TBA-<br>Val] (M) | Run 1             |                   | Run 2             |                   | Run 3             |                   |
|-----------------|-------------------|-------------------|-------------------|-------------------|-------------------|-------------------|-------------------|
|                 |                   | Proton 1<br>(ppm) | Proton 2<br>(ppm) | Proton 1<br>(ppm) | Proton 2<br>(ppm) | Proton 1<br>(ppm) | Proton 2<br>(ppm) |
| 0.010091        | 0                 | 7.881             | 7.685             | 7.884             | 7.686             | 7.883             | 7.684             |
| 0.010091        | 0.001427          | 7.841             | 7.635             | 7.843             | 7.638             | 7.838             | 7.629             |
| 0.010091        | 0.002835          | 7.801             | 7.581             | 7.802             | 7.582             | 7.796             | 7.573             |
| 0.010091        | 0.004225          | 7.762             | 7.528             | 7.765             | 7.532             | 7.755             | 7.518             |
| 0.010091        | 0.005597          | 7.722             | 7.475             | 7.728             | 7.483             | 7.716             | 7.468             |
| 0.010091        | 0.006951          | 7.679             | 7.422             | 7.686             | 7.43              | 7.675             | 7.414             |
| 0.010091        | 0.01026           | 7.609             | 7.332             | 7.61              | 7.333             | 7.606             | 7.329             |
| 0.010091        | 0.013467          | 7.581             | 7.298             | 7.582             | 7.3               | 7.583             | 7.299             |
| 0.010091        | 0.019588          | 7.571             | 7.285             | 7.573             | 7.288             | 7.575             | 7.289             |
| 0.010091        | 0.025349          | 7.569             | 7.282             | 7.57              | 7.283             | 7.573             | 7.287             |
| 0.010091        | 0.030781          | 7.569             | 7.282             | 7.569             | 7.282             | 7.571             | 7.284             |
| 0.010091        | 0.043093          | 7.568             | 7.281             | 7.567             | 7.28              | 7.571             | 7.283             |
| 0.010091        | 0.053867          | 7.567             | 7.279             | 7.567             | 7.28              | 7.571             | 7.282             |
| 0.010091        | 0.071822          | 7.567             | 7.279             | 7.567             | 7.279             | 7.571             | 7.282             |
| 0.010091        | 0.086187          | 7.566             | 7.277             | 7.567             | 7.279             | 7.571             | 7.282             |
| 0.010091        | 0.097939          | 7.566             | 7.277             | 7.567             | 7.279             | 7.571             | 7.282             |
| 0.010091        | 0.107733          | 7.566             | 7.277             | 7.567             | 7.279             |                   |                   |
| 0.010091        | 0.215466          | 7.566             | 7.277             | 7.567             | 7.279             | 7.568             | 7.277             |

**Table S5. Tabulated titration data for CLSS-2 with TBA-Val.**

| [CLSS-2]<br>(M) | [TBA-Val]<br>(M) | Run 1             |                   | Run 2             |                   | Run 3             |                   |
|-----------------|------------------|-------------------|-------------------|-------------------|-------------------|-------------------|-------------------|
|                 |                  | Proton 1<br>(ppm) | Proton 2<br>(ppm) | Proton 1<br>(ppm) | Proton 2<br>(ppm) | Proton 1<br>(ppm) | Proton 2<br>(ppm) |
| 0.010152        | 0                | 8.101             | 7.598             | 8.103             | 7.6               | 8.092             | 7.597             |
| 0.010152        | 0.001367         | 8.088             | 7.563             | 8.088             | 7.564             | 8.084             | 7.559             |
| 0.010152        | 0.002715         | 8.079             | 7.519             | 8.082             | 7.521             | 8.075             | 7.513             |
| 0.010152        | 0.004046         | 8.067             | 7.476             | 8.067             | 7.476             | 8.066             | 7.467             |
| 0.010152        | 0.00536          | 8.058             | 7.433             | 8.056             | 7.433             | 8.053             | 7.424             |
| 0.010152        | 0.006657         | 8.04              | 7.382             | 8.04              | 7.386             | 8.039             | 7.382             |
| 0.010152        | 0.009827         | 8.005             | 7.298             | 8.005             | 7.304             | 8.003             | 7.3               |
| 0.010152        | 0.012897         | 7.993             | 7.271             | 7.991             | 7.269             | 7.99              | 7.268             |
| 0.010152        | 0.01876          | 7.986             | 7.258             | 7.983             | 7.256             | 7.984             | 7.256             |
| 0.010152        | 0.024277         | 7.986             | 7.257             | 7.982             | 7.254             | 7.981             | 7.252             |
| 0.010152        | 0.02948          |                   |                   | 7.982             | 7.252             | 7.981             | 7.252             |
| 0.010152        | 0.041271         | 7.985             | 7.253             | 7.982             | 7.252             | 7.981             | 7.251             |
| 0.010152        | 0.051589         | 7.985             | 7.253             | 7.982             | 7.252             | 7.981             | 7.251             |
| 0.010152        | 0.068786         | 7.985             | 7.253             | 7.982             | 7.252             | 7.981             | 7.25              |
| 0.010152        | 0.082543         | 7.985             | 7.252             | 7.982             | 7.25              | 7.981             | 7.249             |
| 0.010152        | 0.093799         | 7.984             | 7.252             | 7.982             | 7.25              | 7.981             | 7.249             |
| 0.010152        | 0.103178         | 7.984             | 7.252             | 7.982             | 7.25              | 7.981             | 7.248             |
| 0.010152        | 0.206357         | 7.984             | 7.252             | 7.982             | 7.25              | 7.981             | 7.248             |

## MS Data

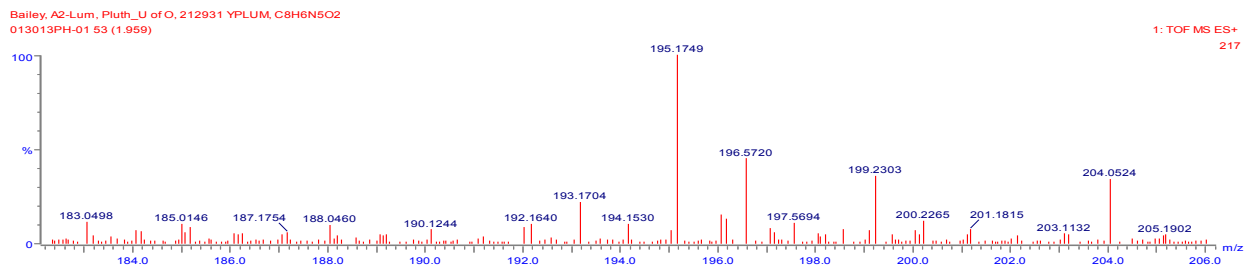

Figure S9. High resolution ESI mass spectrum of CLSS-1.

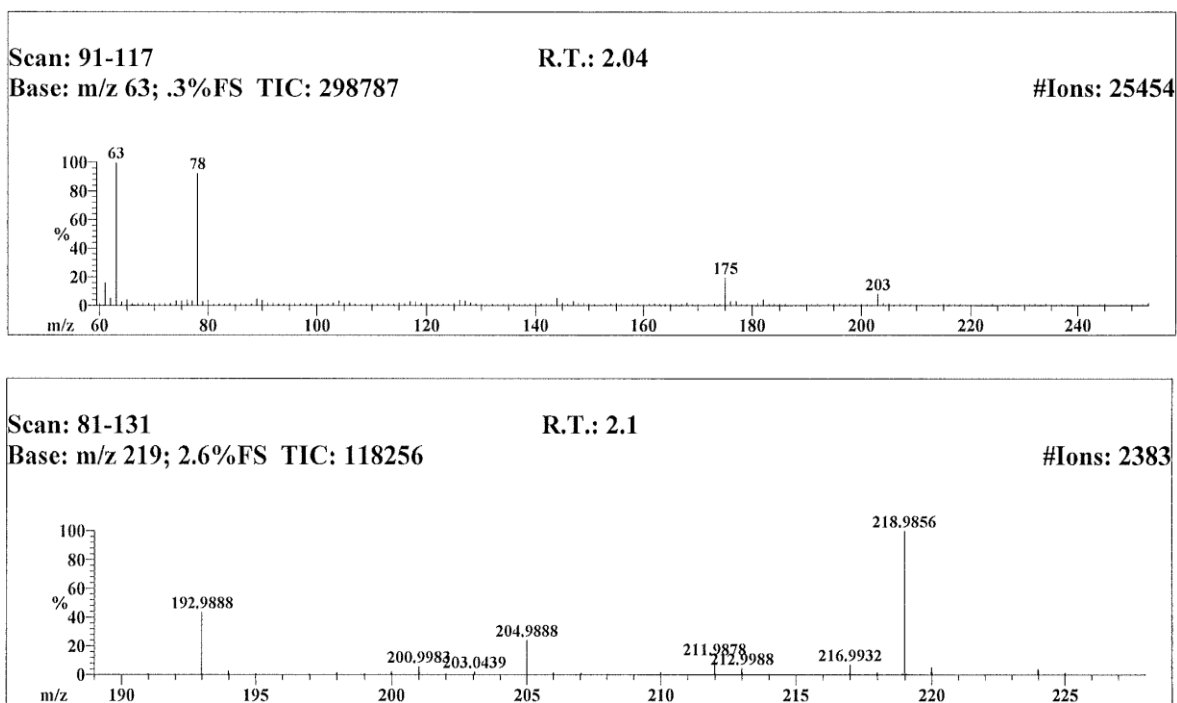

Figure S10. Low resolution (top) and high resolution (bottom) EI mass spectra of CLSS-2.

## UV-Vis Data

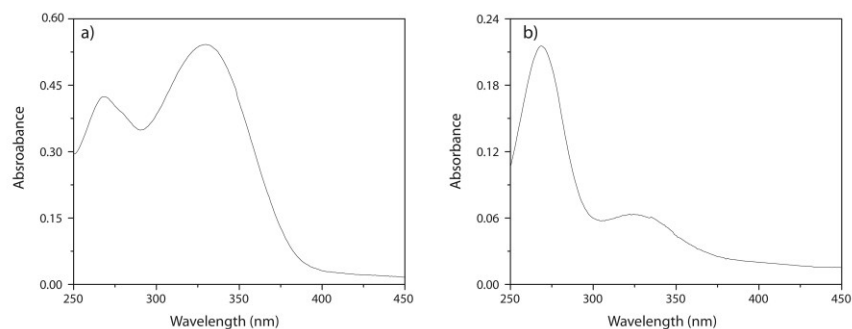

**Figure S11.** UV-Vis spectra of a) CLSS-1 and b) CLSS-2, measured at 33  $\mu\text{M}$  in pH 7.4 PIPES buffer, 37  $^{\circ}\text{C}$ .

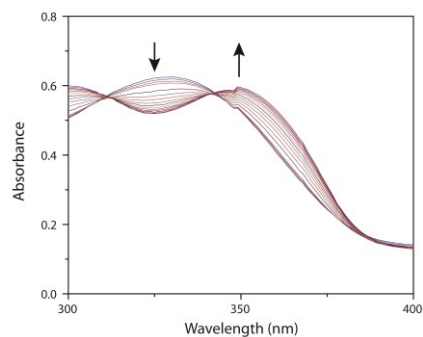

**Figure S12.** UV-Vis spectrum of CLSS-1 during the  $\text{H}_2\text{S}$  mediated reduction. pH 7.4 PIPES buffer, 37  $^{\circ}\text{C}$ , 1 hr.

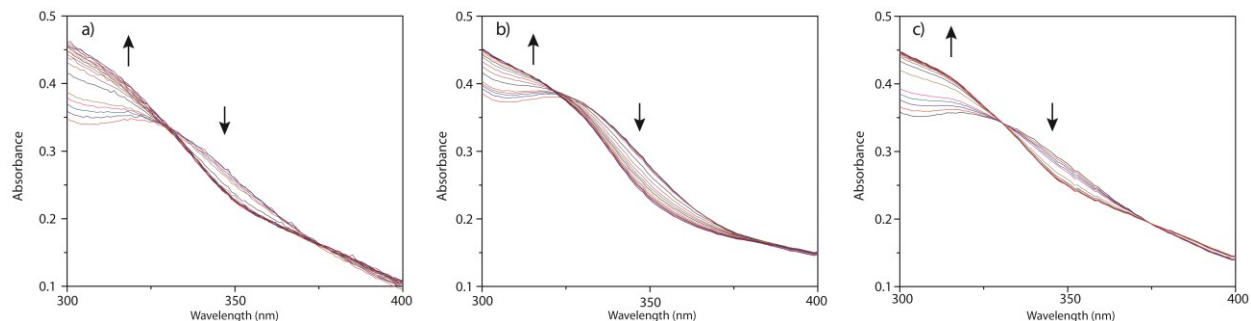

**Figure S13.** pH dependent  $\text{H}_2\text{S}$  reduction of CLSS-2. The spectra show 50  $\mu\text{M}$  CLSS-2 being reduced by 33 equiv.  $\text{H}_2\text{S}$  in a) pH 7.0 PIPES buffer, b) pH 7.4 PIPES buffer, and c) pH 8.0 tris buffer at 37  $^{\circ}\text{C}$  over the course of 1 hr.

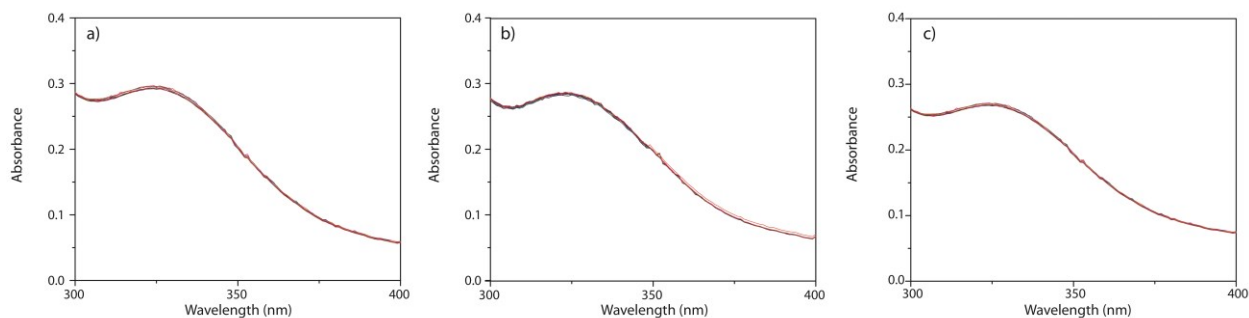

**Figure S14.** pH dependent reaction of CLSS-2 with cysteine. The spectra show 33 equiv. L-cysteine does not react with 50  $\mu\text{M}$  CLSS-2 in a) pH 7.0 PIPES buffer, b) pH 7.4 PIPES buffer, or c) pH 8.0 tris buffer at 37  $^{\circ}\text{C}$  over the course of 1 hr.

## DFT Calculations

### Optimized Geometries

#### Cysteine

Calculated Enthalpy: -721.974543 Hartree

Zero Point Energy: 0.10770 Hartree

Lowest Frequency: 56.7 cm<sup>-1</sup>

Coordinates:

| Atom | x           | y           | z           |
|------|-------------|-------------|-------------|
| N    | -1.40186600 | 1.66348600  | -0.05516900 |
| H    | -1.26669800 | 2.45430400  | -0.67462700 |
| H    | -1.36440400 | 2.00878100  | 0.90013700  |
| C    | -0.40155600 | 0.61171400  | -0.29509000 |
| H    | -0.17542600 | 0.61187900  | -1.36607500 |
| C    | 0.90929300  | 0.80374700  | 0.48509000  |
| C    | -1.07049000 | -0.75149100 | -0.02307600 |
| H    | 1.20901600  | 1.84843300  | 0.39725000  |
| H    | 0.76905600  | 0.58167500  | 1.54419900  |
| S    | 2.36112600  | -0.13352500 | -0.14831200 |
| O    | -0.47125500 | -1.79236500 | 0.13524000  |
| H    | 1.84767900  | -1.36334600 | 0.04928500  |
| O    | -2.40307200 | -0.69553100 | -0.00901300 |
| H    | -2.61303000 | 0.26961600  | -0.10235800 |

#### Luminol Azide (CLSS-1)

Calculated Enthalpy: -732.08227 Hartree

Zero Point Energy: 0.13547 Hartree

Lowest Frequency: 46.9 cm<sup>-1</sup>

Coordinates:

| Atom | x           | y           | z           |
|------|-------------|-------------|-------------|
| C    | 0.35420000  | 2.59415900  | 0.00000600  |
| C    | -0.94958100 | 2.12718700  | 0.00001000  |
| C    | -1.19372700 | 0.75023900  | 0.00001100  |
| C    | -0.13097600 | -0.18091400 | 0.00001400  |
| C    | 1.19421200  | 0.32610000  | 0.00000900  |
| C    | 1.42412800  | 1.69793200  | 0.00000500  |
| H    | 0.55441400  | 3.65852000  | 0.00000000  |
| H    | -1.79170500 | 2.80620000  | 0.00001000  |
| C    | -2.58692400 | 0.26986500  | 0.00000500  |
| C    | -0.48581700 | -1.59696100 | 0.00001200  |
| H    | 2.43954400  | 2.07592900  | -0.00000300 |
| N    | -1.70674900 | -2.02071800 | -0.00002600 |
| N    | -2.70089900 | -1.09157600 | -0.00005600 |
| O    | 0.44541300  | -2.57594800 | 0.00005700  |
| O    | -3.58294300 | 0.99863700  | 0.00000900  |
| N    | 2.24150100  | -0.62726600 | -0.00000200 |
| N    | 3.41812500  | -0.25101900 | -0.00002900 |
| N    | 4.52536000  | -0.03613600 | -0.00002200 |
| H    | -3.63363200 | -1.48335400 | -0.00006300 |
| H    | 1.33715100  | -2.17744700 | 0.00004400  |

#### Luminol Azide – Cysteine (CLSS-1/Cys; N<sub>3</sub>-H bond)

Calculated Enthalpy: -1454.066548 Hartree

Zero Point Energy: 0.245206 Hartree

Lowest Frequency: 13.8 cm<sup>-1</sup>

Coordinates:

| Atom | x           | y           | z           |
|------|-------------|-------------|-------------|
| C    | -4.82580600 | -1.01615500 | -0.06144100 |
| C    | -4.46905700 | 0.31492900  | -0.22493500 |
| C    | -3.12841600 | 0.68652200  | -0.13186900 |
| C    | -2.11563200 | -0.27016600 | 0.11832500  |
| C    | -2.49338200 | -1.63274600 | 0.21334300  |
| C    | -3.84511300 | -1.97873500 | 0.15276200  |
| H    | -5.86568900 | -1.31430200 | -0.11650700 |
| H    | -5.20975500 | 1.07887300  | -0.41919800 |
| C    | -2.79734600 | 2.12191200  | -0.31637500 |
| C    | -0.73649200 | 0.19832500  | 0.35807800  |
| H    | -4.10976500 | -3.02349100 | 0.25587800  |
| N    | -0.50854100 | 1.51134000  | 0.18530100  |
| H    | 0.44565700  | 1.89768200  | 0.35655700  |
| N    | -1.48252100 | 2.42213800  | -0.16799500 |
| H    | -1.16477900 | 3.37506500  | -0.28682400 |
| O    | 0.19099500  | -0.55070400 | 0.73566200  |
| O    | -3.62229300 | 2.99198400  | -0.59906300 |
| N    | -1.62709800 | -2.73515200 | 0.43264400  |
| N    | -0.57001900 | -2.86411200 | -0.18251700 |
| N    | 0.40221800  | -3.15526700 | -0.67915400 |
| O    | 2.00989700  | 2.42809800  | 0.61518400  |
| C    | 3.07782800  | 2.06164000  | 0.04191800  |
| C    | 3.59045600  | 0.63223600  | 0.39280500  |
| O    | 3.77578200  | 2.69544000  | -0.76240700 |
| N    | 2.76301400  | 0.04554000  | 1.50053200  |
| H    | 4.60862900  | 0.71764400  | 0.77393300  |
| C    | 3.57125100  | -0.27764400 | -0.83616300 |
| H    | 1.77059800  | -0.13585500 | 1.19655300  |
| H    | 2.57047800  | -0.35285200 | -1.26094900 |
| H    | 4.22439900  | 0.16394600  | -1.58540700 |
| S    | 4.19957000  | -1.98815900 | -0.52702300 |
| H    | 3.00104000  | -2.58534500 | -0.36769000 |
| H    | 3.17105300  | -0.83541200 | 1.82322800  |
| H    | 2.72084600  | 0.69394200  | 2.28742200  |

### Luminol Azide – Cysteine (CLSS-1/Cys; No N<sub>3</sub>-H bond)

Calculated Enthalpy: -1454.063897 Hartree

Zero Point Energy: 0.245530 Hartree

Lowest Frequency: 12.1 cm<sup>-1</sup>

Coordinates:

| Atom | x           | y           | z           |
|------|-------------|-------------|-------------|
| C    | -5.07376700 | 0.63752700  | 0.13156500  |
| C    | -4.55917800 | -0.64086400 | 0.29597300  |
| C    | -3.18394000 | -0.84896000 | 0.19978800  |
| C    | -2.29330300 | 0.22250600  | -0.05183000 |
| C    | -2.83238800 | 1.52994300  | -0.14281400 |
| C    | -4.21599700 | 1.71095800  | -0.08202400 |
| H    | -6.14195200 | 0.80820200  | 0.18671800  |
| H    | -5.20235100 | -1.48818800 | 0.49201900  |
| C    | -2.68186400 | -2.23365300 | 0.38533900  |

|   |             |             |             |
|---|-------------|-------------|-------------|
| C | -0.87043100 | -0.07764800 | -0.30991800 |
| H | -4.60361400 | 2.71678300  | -0.18304000 |
| N | -0.48652300 | -1.35509000 | -0.13818000 |
| H | 0.48669700  | -1.64095300 | -0.37472700 |
| N | -1.34411800 | -2.37716300 | 0.21339300  |
| H | -0.90984700 | -3.27961400 | 0.35558200  |
| O | -0.04478600 | 0.77357700  | -0.70589400 |
| O | -3.39275100 | -3.19365300 | 0.68629000  |
| N | -2.10396400 | 2.72856300  | -0.35491800 |
| N | -1.06908800 | 2.97203900  | 0.26552800  |
| N | -0.13819400 | 3.36548400  | 0.76971900  |
| O | 2.07572100  | -2.03303600 | -0.77541600 |
| C | 3.13406300  | -1.52156300 | -0.30650400 |
| C | 3.50964600  | -0.11306000 | -0.85852300 |
| O | 3.91355300  | -2.01204700 | 0.52609900  |
| N | 2.43834500  | 0.32383500  | -1.82700100 |
| H | 4.43157000  | -0.20062700 | -1.43556400 |
| C | 3.67570900  | 0.95511500  | 0.23059700  |
| H | 1.51890800  | 0.50866700  | -1.34852400 |
| H | 3.66188300  | 1.95068600  | -0.21608200 |
| H | 2.86261600  | 0.90049800  | 0.95526500  |
| S | 5.28746500  | 0.86520300  | 1.10619600  |
| H | 5.18099100  | -0.44677400 | 1.41013200  |
| H | 2.71587600  | 1.15665800  | -2.34896800 |
| H | 2.25938100  | -0.43279400 | -2.49025500 |

### Luminol Azide Trimer [(CLSS-1)<sub>3</sub>]

Calculated Enthalpy: -2196.276923 Hartree

Zero Point Energy: 0.409041 Hartree

Lowest Frequency: 13.0 cm<sup>-1</sup>

Coordinates:

| Atom | x           | y           | z           |
|------|-------------|-------------|-------------|
| C    | -4.77132500 | 5.00404100  | -0.00159300 |
| C    | -4.55234100 | 3.63728300  | -0.00073800 |
| C    | -3.24240000 | 3.15077600  | 0.00003700  |
| C    | -2.12368300 | 4.02287700  | -0.00014000 |
| C    | -2.37605800 | 5.42230500  | -0.00093100 |
| C    | -3.69282800 | 5.88611900  | -0.00164700 |
| H    | -5.78016800 | 5.39827100  | -0.00217600 |
| H    | -5.37187400 | 2.93168700  | -0.00061200 |
| C    | -3.03206400 | 1.69801700  | 0.00117100  |
| C    | -0.80346500 | 3.39969500  | 0.00051700  |
| H    | -3.88267800 | 6.95287100  | -0.00222200 |
| N    | -0.64085600 | 2.10985200  | 0.00176800  |
| N    | -1.74170300 | 1.30876500  | 0.00229900  |
| O    | 0.28435400  | 4.17025800  | -0.00025400 |
| O    | -3.95382600 | 0.85257500  | 0.00128300  |
| N    | -1.28169500 | 6.31096000  | -0.00087500 |
| N    | -1.49523800 | 7.52391500  | -0.00175000 |
| N    | -1.52826500 | 8.65512700  | -0.00244400 |
| H    | 1.12498800  | 3.63170800  | 0.00005200  |
| H    | -1.55452800 | 0.29716000  | 0.00277500  |
| N    | -1.50828400 | -1.60987100 | 0.00232200  |



|   |             |             |             |
|---|-------------|-------------|-------------|
| C | -2.54371600 | -2.39587600 | 0.00069500  |
| N | -0.26396000 | -2.16219800 | 0.00313700  |
| C | -2.42297000 | -3.85056700 | -0.00028800 |
| O | -3.75514700 | -1.83964000 | -0.00015600 |
| C | 0.04449100  | -3.47434100 | 0.00210800  |
| H | 0.51783600  | -1.49354800 | 0.00353800  |
| C | -1.10827800 | -4.38311700 | 0.00039200  |
| C | -3.50879600 | -4.76854500 | -0.00186200 |
| H | -3.70918300 | -0.84229100 | 0.00048300  |
| O | 1.23757800  | -3.84974600 | 0.00272200  |
| C | -0.87472700 | -5.76082700 | -0.00054500 |
| C | -3.25220500 | -6.14085100 | -0.00276800 |
| N | -4.82545100 | -4.26437200 | -0.00246100 |
| C | -1.94897200 | -6.63373000 | -0.00213000 |
| H | 0.14604100  | -6.11798300 | 0.00002300  |
| H | -4.08076500 | -6.83901700 | -0.00396900 |
| N | -5.76967800 | -5.05522300 | -0.00359200 |
| H | -1.78596900 | -7.70453600 | -0.00286300 |
| N | -6.73314600 | -5.64887200 | -0.00462000 |
| N | 2.14887000  | -0.49979000 | 0.00243100  |
| C | 3.34716900  | -1.00402100 | 0.00155100  |
| N | 2.00581100  | 0.85409800  | 0.00238200  |
| C | 4.54712700  | -0.17255100 | 0.00064000  |
| O | 3.47012500  | -2.33133100 | 0.00125000  |
| C | 2.98819800  | 1.77679600  | 0.00087900  |
| H | 1.03625100  | 1.19787500  | 0.00274700  |
| C | 4.35145500  | 1.23245200  | -0.00016000 |
| C | 5.88515800  | -0.65401900 | 0.00027200  |
| H | 2.58321700  | -2.78961800 | 0.00175200  |
| O | 2.71657500  | 2.99770800  | 0.00060500  |
| C | 5.42791800  | 2.12337400  | -0.00173600 |
| C | 6.94542700  | 0.25426900  | -0.00143600 |
| N | 6.10689100  | -2.04628500 | 0.00174900  |
| C | 6.72096000  | 1.62936000  | -0.00250200 |
| H | 5.22696300  | 3.18599000  | -0.00226800 |
| H | 7.96442000  | -0.11422800 | -0.00181400 |
| N | 7.26376400  | -2.46872100 | 0.00162400  |
| H | 7.56693200  | 2.30577000  | -0.00386200 |
| N | 8.25962400  | -3.00627500 | 0.00175900  |

### Isoluminol Azide (CLSS-2)

Calculated Enthalpy: -732.088312 Hartree

Zero Point Energy: 0.134688 Hartree

Lowest Frequency: 53.4 cm<sup>-1</sup>

Coordinates:

| Atom | x           | y           | z           |
|------|-------------|-------------|-------------|
| C    | 1.57997700  | -1.14733000 | 0.01396300  |
| C    | 0.28900100  | -1.64579800 | 0.02037300  |
| C    | -0.80958100 | -0.77889300 | 0.01245400  |
| C    | -0.58917300 | 0.61055100  | -0.00850200 |
| C    | 0.70805900  | 1.11720100  | -0.01408100 |
| C    | 1.79314800  | 0.24252500  | -0.00404900 |
| H    | 2.41953900  | -1.83217100 | 0.02249200  |
| H    | 0.11419200  | -2.71385400 | 0.03262200  |

|   |             |             |             |
|---|-------------|-------------|-------------|
| C | -2.17792700 | -1.33478700 | 0.00413200  |
| C | -1.72990800 | 1.55877500  | -0.00482900 |
| N | -2.95568900 | 0.96964200  | -0.04195100 |
| H | -3.77769900 | 1.54299200  | 0.09549900  |
| N | -3.17126800 | -0.40192600 | 0.04364700  |
| H | -4.12650300 | -0.69653400 | -0.11191400 |
| O | -1.61623700 | 2.78450000  | 0.02155100  |
| O | -2.44451200 | -2.53746100 | -0.02656900 |
| H | 0.86782400  | 2.18712900  | -0.02686600 |
| N | 3.07179100  | 0.84223700  | -0.01260500 |
| N | 4.07229400  | 0.11824000  | -0.00380800 |
| N | 5.06959300  | -0.41352600 | 0.00207900  |

### Isoluminol Azide – Cysteine (CLSS-2 /Cys)

Calculated Enthalpy: -1454.075989 Hartree

Zero Point Energy: 0.245238 Hartree

Lowest Frequency: 21.8 cm<sup>-1</sup>

Coordinates:

| Atom | x           | y           | z           |
|------|-------------|-------------|-------------|
| C    | -4.42835800 | 0.60307700  | -0.30380400 |
| C    | -3.64173800 | 1.73866800  | -0.33998100 |
| C    | -2.25921100 | 1.65031900  | -0.13073600 |
| C    | -1.68010100 | 0.39310500  | 0.11626400  |
| C    | -2.47027500 | -0.75648500 | 0.15369200  |
| C    | -3.84378100 | -0.65150200 | -0.05650800 |
| H    | -5.49762300 | 0.66256900  | -0.46377600 |
| H    | -4.08292800 | 2.70860700  | -0.52962900 |
| C    | -1.42999200 | 2.87014500  | -0.17306300 |
| C    | -0.22660900 | 0.27602300  | 0.34696900  |
| N    | 0.47208300  | 1.41995700  | 0.28725700  |
| H    | 1.50376300  | 1.41831900  | 0.44577600  |
| N    | -0.10264100 | 2.65394200  | 0.04607400  |
| H    | 0.54208200  | 3.43282300  | 0.02602600  |
| O    | 0.33711500  | -0.81536600 | 0.58571300  |
| O    | -1.86051600 | 4.00579100  | -0.38471600 |
| O    | 3.14288500  | 1.36518800  | 0.75404300  |
| C    | 4.09748300  | 0.64538900  | 0.33720000  |
| C    | 4.06106900  | -0.85328200 | 0.75506900  |
| O    | 5.08012300  | 0.98702600  | -0.33541600 |
| N    | 2.86427500  | -1.11141900 | 1.63323400  |
| H    | 4.93526300  | -1.03729100 | 1.38449500  |
| C    | 4.12843900  | -1.82980200 | -0.41757300 |
| H    | 1.94030800  | -0.98466500 | 1.14195900  |
| H    | 5.10349400  | -1.70493800 | -0.88529700 |
| H    | 4.05762100  | -2.86178600 | -0.07174000 |
| S    | 2.93162000  | -1.56305200 | -1.79257700 |
| H    | 1.80725900  | -1.93088200 | -1.14521200 |
| H    | 2.88912700  | -2.04948900 | 2.03701400  |
| H    | 2.86257600  | -0.43719500 | 2.40050700  |
| N    | -4.73157200 | -1.75024200 | -0.03911000 |
| N    | -4.27613300 | -2.87729400 | 0.17976900  |
| N    | -3.99922600 | -3.95687700 | 0.36588300  |
| H    | -1.99278200 | -1.70876300 | 0.34718400  |

**Isoluminol Azide Trimer [(CLSS-2)<sub>3</sub>]**

Calculated Enthalpy: -2196.305164 Hartree

Zero Point Energy: 0.409167 Hartree

Lowest Frequency: 10.2 cm<sup>-1</sup>

Coordinates:

| Atom | x           | y           | z           |
|------|-------------|-------------|-------------|
| C    | 5.19845400  | -4.53825300 | -0.10318600 |
| C    | 3.82601600  | -4.41709500 | -0.03570600 |
| C    | 3.23091800  | -3.14851500 | 0.03279900  |
| C    | 4.04797500  | -1.99765300 | 0.03312100  |
| C    | 5.44106400  | -2.11957500 | -0.03509900 |
| C    | 6.01127900  | -3.38723800 | -0.10494000 |
| H    | 5.66939900  | -5.51170900 | -0.15743900 |
| H    | 3.19372000  | -5.29543500 | -0.03613000 |
| C    | 1.77860200  | -2.99503600 | 0.09525300  |
| C    | 3.39293500  | -0.70193800 | 0.09833800  |
| N    | 2.10424300  | -0.57884500 | 0.15667300  |
| N    | 1.34686600  | -1.71307400 | 0.16074000  |
| O    | 4.16663200  | 0.38683100  | 0.09241900  |
| O    | 0.95793400  | -3.94039600 | 0.09026700  |
| H    | 3.63390300  | 1.23139100  | 0.11854400  |
| H    | 0.33020600  | -1.55766100 | 0.18207800  |
| N    | -1.55367500 | -1.53194700 | 0.13829100  |
| C    | -2.30437000 | -2.58698300 | 0.08686500  |
| N    | -2.15784900 | -0.30935800 | 0.14299500  |
| C    | -3.75449800 | -2.50726100 | 0.03237100  |
| O    | -1.74773100 | -3.80107800 | 0.07915200  |
| C    | -3.48437900 | -0.04289900 | 0.08515700  |
| H    | -1.51465600 | 0.49326500  | 0.16379500  |
| C    | -4.34339500 | -1.22446500 | 0.03339600  |
| C    | -4.55671900 | -3.65328300 | -0.02551900 |
| H    | -0.74953200 | -3.76152600 | 0.09538000  |
| O    | -3.89288800 | 1.14046200  | 0.07860500  |
| C    | -5.74017600 | -1.10651400 | -0.02263700 |
| C    | -5.94020400 | -3.51419000 | -0.08351800 |
| C    | -6.53137900 | -2.23512800 | -0.07943600 |
| H    | -6.18531100 | -0.12002100 | -0.02146700 |
| H    | -7.61039500 | -2.15695200 | -0.12375900 |
| N    | -0.54903100 | 2.11107600  | 0.13372000  |
| C    | -1.08731200 | 3.28828600  | 0.07238700  |
| N    | 0.81170500  | 2.02394600  | 0.16236900  |
| C    | -0.29319800 | 4.50462200  | 0.02734500  |
| O    | -2.41678700 | 3.41279000  | 0.04520100  |
| C    | 1.70585600  | 3.04018500  | 0.11699700  |
| H    | 1.18600600  | 1.06608100  | 0.18778300  |
| C    | 1.11187200  | 4.37438400  | 0.05295700  |
| C    | -0.88457200 | 5.77168000  | -0.04428600 |
| H    | -2.88238100 | 2.52912900  | 0.06813400  |
| O    | 2.93505300  | 2.80322600  | 0.13021900  |
| C    | 1.91226200  | 5.52570500  | 0.00883400  |
| C    | -0.07253100 | 6.90095200  | -0.09092600 |
| C    | 1.33050500  | 6.77459500  | -0.06107800 |
| H    | 2.98905300  | 5.41895600  | 0.02919600  |
| H    | 1.93770900  | 7.67036700  | -0.09660000 |

|   |             |             |             |
|---|-------------|-------------|-------------|
| N | 7.40127400  | -3.62617500 | -0.18225200 |
| N | 8.17177800  | -2.66082400 | -0.20022800 |
| N | 8.98742800  | -1.87940300 | -0.22545200 |
| N | -6.84152900 | -4.59970200 | -0.15097700 |
| N | -6.38827900 | -5.74866300 | -0.17097000 |
| N | -6.11661000 | -6.84506100 | -0.19644200 |
| H | 6.05012000  | -1.22507800 | -0.03436400 |
| H | -4.08617300 | -4.62781900 | -0.02769300 |
| N | -0.56147100 | 8.22378800  | -0.17063900 |
| N | -1.78239800 | 8.40574200  | -0.21765100 |
| N | -2.86669800 | 8.71937100  | -0.26744700 |
| H | -1.96372900 | 5.85025100  | -0.06400800 |

---
